# Supplementary material
Source: PubMed Central journal article supplement (PMC1475669)

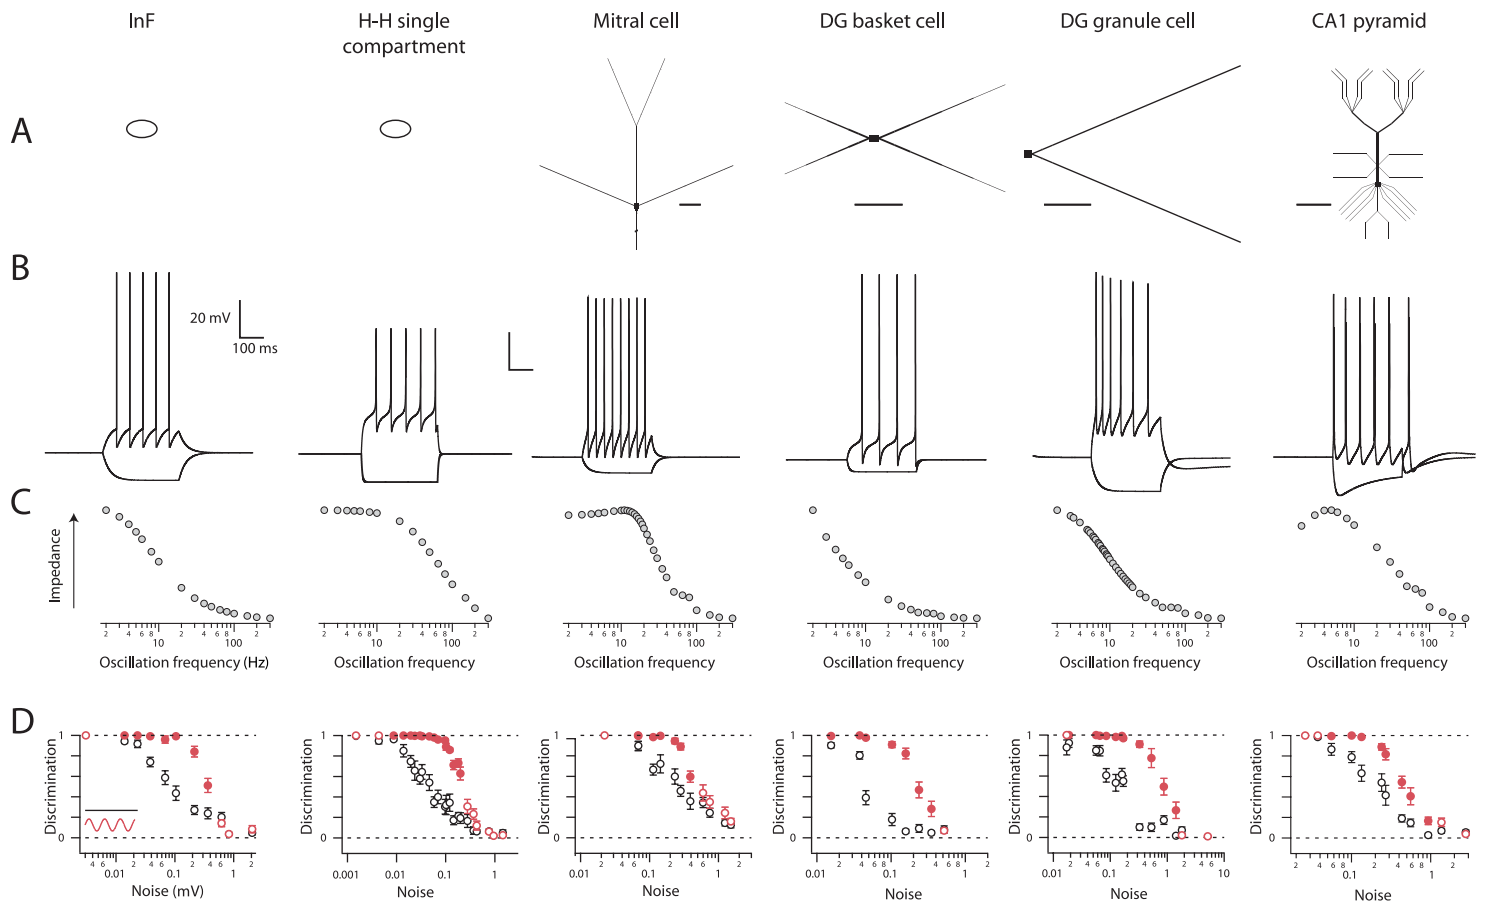

Figure S1 - Schaefer, Angelo, Spors and Margrie

Supplement: pbio.0040163.sg001.pdf [file pbio.0040163.sg001.pdf]

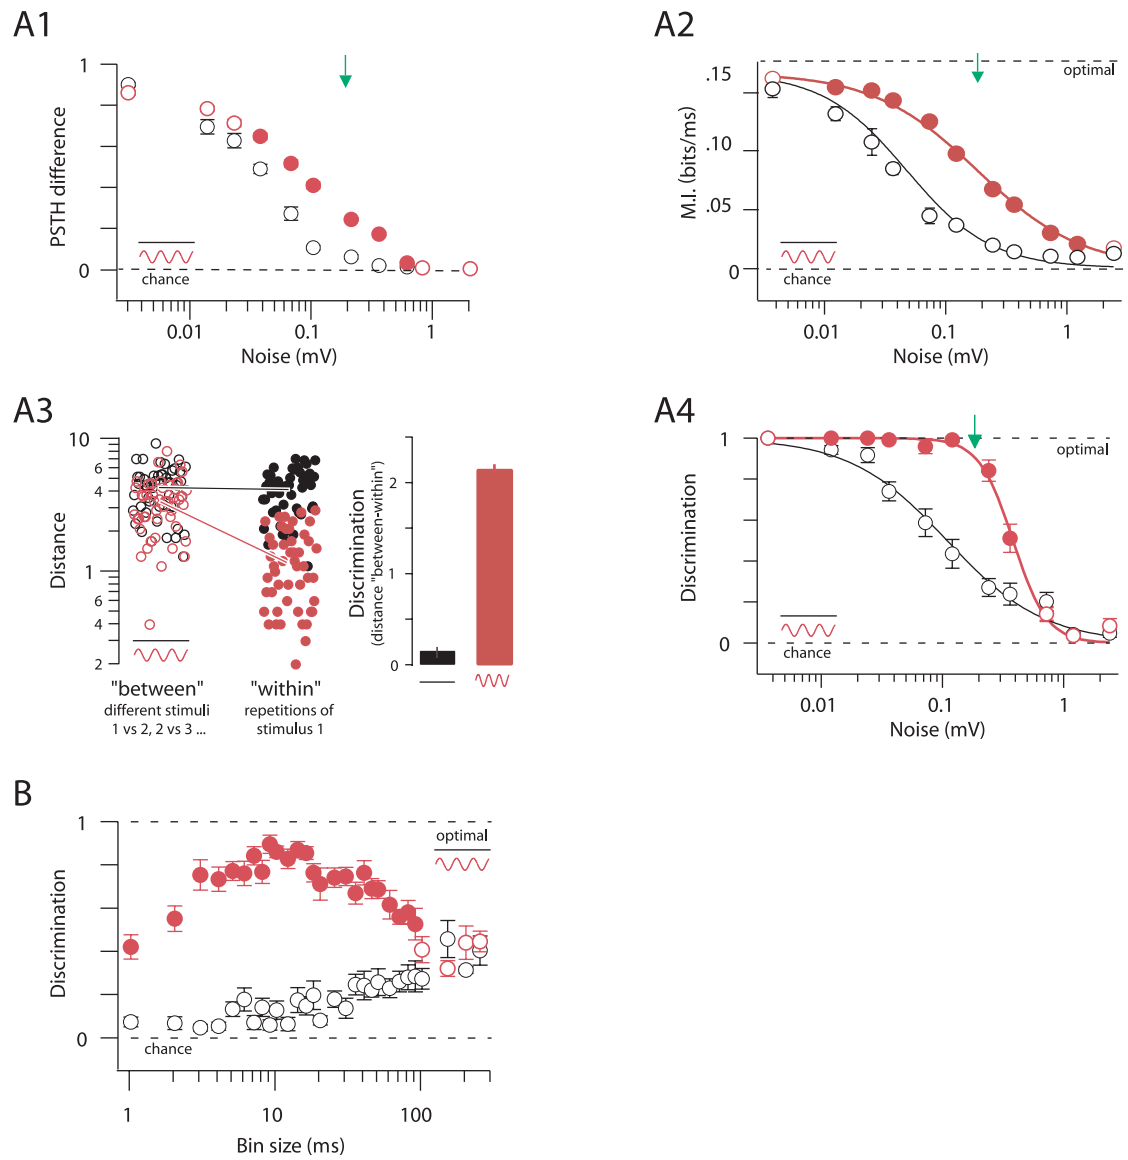

Figure S2 - Schaefer, Angelo, Spors and Margrie

Supplement: pbio.0040163.sg002.pdf [file pbio.0040163.sg002.pdf]

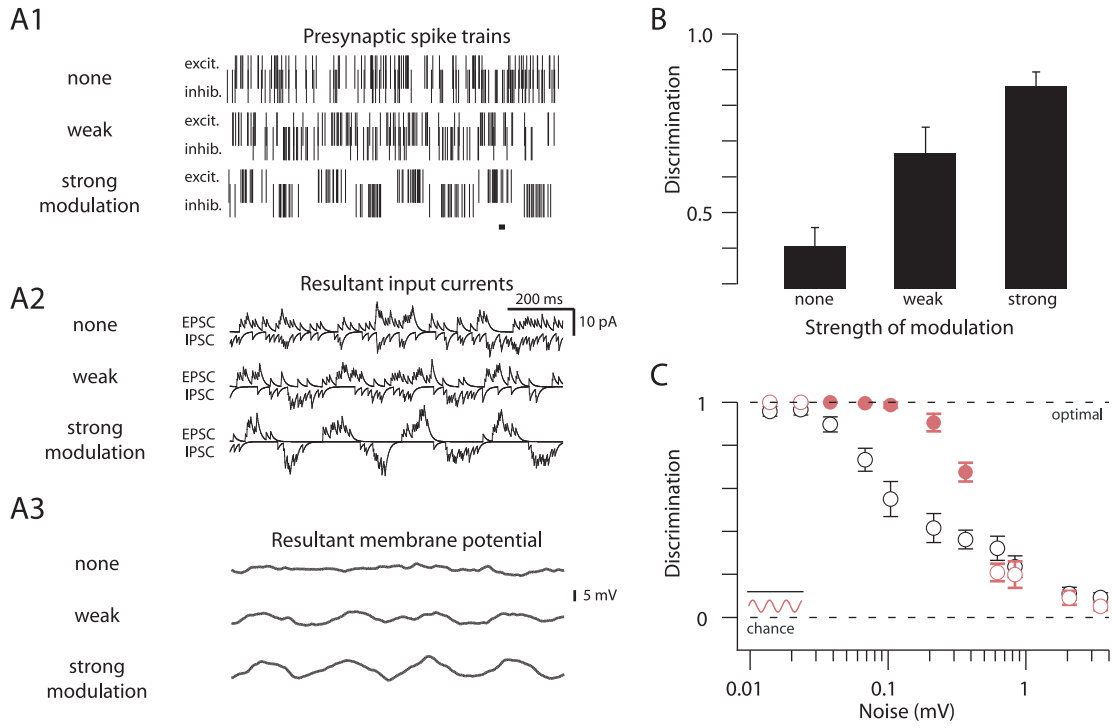

Figure S3 - Schaefer, Angelo, Spors and Margrie

Supplement: pbio.0040163.sg003.pdf [file pbio.0040163.sg003.pdf]

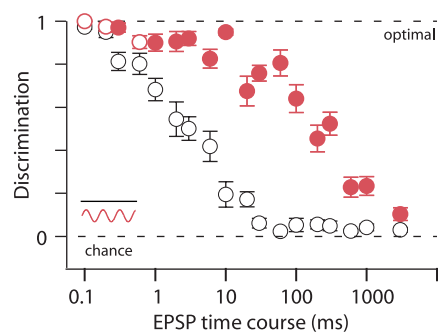

Figure S4 - Schaefer, Angelo, Spors and Margrie

Supplement: pbio.0040163.sg004.pdf [file pbio.0040163.sg004.pdf]
